# Supplementary material for: Quaternary Ammonium Compounds (QACs) and Ionic Liquids (ILs) as Biocides: From Simple Antiseptics to Tunable Antimicrobials
Source: MDPI journal article supplement (doi:10.3390/ijms22136793), 2021-06-24
Supplement: s1 [file s1]

# Quaternary Ammonium Compounds (QACs) and Ionic Liquids (ILs) as Biocides: From Simple Antiseptics to Tunable Antimicrobials

Anatoly N. Vereshchagin<sup>a</sup>, Nikita A. Frolov<sup>a</sup>, Ksenia S. Egorova<sup>a</sup>, Marina M. Seitkalieva<sup>a</sup>,

Valentine P. Ananikov<sup>a</sup>

<sup>a</sup>*N. D. Zelinsky Institute of Organic Chemistry, Russian Academy of Sciences, Leninsky prospect 47, Moscow 119991, Russia; vereshchagin@ioc.ac.ru (A. N. V.); nikitafrolov298@gmail.com (N. A. F.); egorova-ks@ioc.ac.ru (K. S. E.); s\_marina@ioc.ac.ru (M. M. S.); val@ioc.ac.ru (V. P. A.).*

**Table S1.** Antimicrobial activity of common ILs \*

| IL                                              | Acronym                    | Species                                  | MIC, $\mu\text{g mL}^{-1}$ | MBC, $\mu\text{g mL}^{-1}$ | Method                                                         | Notes                                    | Ref.   |
|-------------------------------------------------|----------------------------|------------------------------------------|----------------------------|----------------------------|----------------------------------------------------------------|------------------------------------------|--------|
| 1-Ethyl-3-methylimidazolium chloride            | [C <sub>2</sub> Mim][Cl]   | <i>L. monocytogenes</i> ATCC13932        | >5000                      |                            | Broth microdilution                                            |                                          | [1]    |
|                                                 |                            | <i>B. cereus</i> ATCC 11778              | >5000                      |                            |                                                                |                                          |        |
|                                                 |                            | <i>S. aureus</i> ATCC 6538               | >5000                      |                            |                                                                |                                          |        |
|                                                 |                            | <i>E. faecalis</i> ATCC 19433            | >5000                      |                            |                                                                |                                          |        |
|                                                 |                            | <i>L. sakei</i> ATCC 15521               | >5000                      |                            |                                                                |                                          |        |
|                                                 |                            | <i>L. lactis</i> ATCC 19435              | >5000                      |                            |                                                                |                                          |        |
|                                                 |                            | <i>S. typhimurium</i> ATCC 14028         | >5000                      |                            |                                                                |                                          |        |
|                                                 |                            | <i>E. coli</i> ATCC 25922                | >5000                      |                            |                                                                |                                          |        |
| 1-(2-Hydroxyethyl)-3-methylimidazolium chloride | [HOC <sub>2</sub> Mim][Cl] | <i>C. freundii</i> ATCC 27853            | >5000                      |                            | Broth microdilution                                            |                                          |        |
|                                                 |                            | <i>E. coli</i> ATCC 25922                | 5000 $\mu\text{M}$         |                            |                                                                |                                          |        |
|                                                 |                            | <i>E. coli</i> TEM CTX M9                | >5000 $\mu\text{M}$        |                            |                                                                |                                          |        |
|                                                 |                            | <i>E. coli</i> CTX M2                    | 2500 $\mu\text{M}$         |                            |                                                                |                                          |        |
|                                                 |                            | <i>E. coli</i> AmpC MOX2                 | 5000 $\mu\text{M}$         |                            |                                                                |                                          |        |
|                                                 |                            | <i>K. pneumoniae</i> (clinical isolate)  | >5000 $\mu\text{M}$        |                            |                                                                |                                          |        |
|                                                 |                            | <i>S. aureus</i> ATCC 25293              | >5000 $\mu\text{M}$        |                            |                                                                |                                          |        |
|                                                 |                            | <i>S. epidermidis</i> (clinical isolate) | 5000 $\mu\text{M}$         |                            |                                                                |                                          |        |
| 1-Butyl-3-methylimidazolium chloride            | [C <sub>4</sub> Mim][Cl]   | <i>E. faecalis</i> (clinical isolate)    | 5000 $\mu\text{M}$         |                            | Agar disk diffusion / agar well diffusion, broth microdilution | Weak anti-adhesive activity <sup>a</sup> | [1, 3] |
|                                                 |                            | <i>P. aeruginosa</i> PTCC1310            | 12500                      | 12500                      |                                                                |                                          |        |
|                                                 |                            | <i>S. aureus</i> PTCC1112                | 50000                      | 50000                      |                                                                |                                          |        |
|                                                 |                            | <i>S. aureus</i> ATCC 6538               | >5000                      |                            |                                                                |                                          |        |
|                                                 |                            | <i>E. coli</i> PTCC 1338                 | 12500                      | 12500                      |                                                                |                                          |        |
|                                                 |                            | <i>E. coli</i> ATCC 25922                | >5000                      |                            |                                                                |                                          |        |
|                                                 |                            | <i>B. cereus</i> PTCC 1015               | 50000                      | 50000                      |                                                                |                                          |        |

|                                                 |                                        |                                    |       |       |                                           |                                          |     |
|-------------------------------------------------|----------------------------------------|------------------------------------|-------|-------|-------------------------------------------|------------------------------------------|-----|
|                                                 |                                        | <i>B. cereus</i> ATCC 11778        | >5000 |       |                                           |                                          |     |
|                                                 |                                        | <i>S. typhimurium</i> (wild type)  | 12500 | 50000 |                                           |                                          |     |
|                                                 |                                        | <i>S. typhimurium</i> ATCC 14028   | >5000 |       |                                           |                                          |     |
|                                                 |                                        | <i>K. pneumonia</i> PTCC 1290      | 25000 | N.D.  |                                           |                                          |     |
|                                                 |                                        | <i>B. subtilis</i> PTCC 1715       | 50000 | N.D.  |                                           |                                          |     |
|                                                 |                                        | <i>L. monocytogenes</i> ATCC 13932 | >5000 |       |                                           |                                          |     |
|                                                 |                                        | <i>E. faecalis</i> ATCC 19433      | >5000 |       |                                           |                                          |     |
|                                                 |                                        | <i>L. sakei</i> ATCC 15521         | 4167  |       |                                           |                                          |     |
|                                                 |                                        | <i>L. lactis</i> ATCC 19435        | 3333  |       |                                           |                                          |     |
|                                                 |                                        | <i>C. freundii</i> ATCC 27853      | >5000 |       |                                           |                                          |     |
| 1-Butyl-3-methylimidazolium iodide              | [C <sub>4</sub> Mim][I]                | <i>P. aeruginosa</i> PTCC 1310     | 12500 | 12500 | Agar disk diffusion / agar well diffusion | Weak anti-adhesive activity <sup>a</sup> | [3] |
|                                                 |                                        | <i>S. aureus</i> PTCC 1112         | 12500 | 25000 |                                           |                                          |     |
|                                                 |                                        | <i>E. coli</i> PTCC 1338           | 25000 | 25000 |                                           |                                          |     |
|                                                 |                                        | <i>B. cereus</i> PTCC 1015         | 50000 | 50000 |                                           |                                          |     |
|                                                 |                                        | <i>S. typhimurium</i> (wild type)  | 12500 | 25000 |                                           |                                          |     |
|                                                 |                                        | <i>K. pneumonia</i> PTCC 1290      | 25000 | 25000 |                                           |                                          |     |
|                                                 |                                        | <i>B. subtilis</i> PTCC 1715       | 25000 | 25000 |                                           |                                          |     |
| 1-Butyl-3-methylimidazolium hexafluorophosphate | [C <sub>4</sub> Mim][PF <sub>6</sub> ] | <i>P. aeruginosa</i> PTCC 1310     | 25000 | 50000 | Agar disk diffusion / agar well diffusion |                                          | [3] |
|                                                 |                                        | <i>S. aureus</i> PTCC 1112         | 25000 | 25000 |                                           |                                          |     |
|                                                 |                                        | <i>E. coli</i> PTCC 1338           | 12500 | 12500 |                                           |                                          |     |
|                                                 |                                        | <i>B. cereus</i> PTCC 1015         | 50000 | 50000 |                                           |                                          |     |
|                                                 |                                        | <i>S. typhimurium</i> (wild type)  | 50000 | 50000 |                                           |                                          |     |
|                                                 |                                        | <i>K. pneumonia</i> PTCC 1290      | 25000 | 25000 |                                           |                                          |     |
|                                                 |                                        | <i>B. subtilis</i> PTCC 1715       | 50000 | 50000 |                                           |                                          |     |
| 1-Butyl-3-methylimidazolium tetrafluoroborate   | [C <sub>4</sub> Mim][BF <sub>4</sub> ] | <i>P. aeruginosa</i> PTCC 1310     | 12500 | 50000 | Agar disk diffusion / agar well diffusion |                                          | [3] |
|                                                 |                                        | <i>S. aureus</i> PTCC 1112         | 12500 | 12500 |                                           |                                          |     |
|                                                 |                                        | <i>E. coli</i> PTCC 1338           | 12500 | 12500 |                                           |                                          |     |
|                                                 |                                        | <i>B. cereus</i> PTCC 1015         | 50000 | 50000 |                                           |                                          |     |
|                                                 |                                        | <i>S. typhimurium</i> (wild type)  | 12500 | 12500 |                                           |                                          |     |
|                                                 |                                        | <i>K. pneumonia</i> PTCC 1290      | 25000 | N.D.  |                                           |                                          |     |
|                                                 |                                        | <i>B. subtilis</i> PTCC 1715       | 50000 | N.D.  |                                           |                                          |     |

|                                              |                                                        |                                   |       |       |                                           |                                     |     |
|----------------------------------------------|--------------------------------------------------------|-----------------------------------|-------|-------|-------------------------------------------|-------------------------------------|-----|
| 1-Butyl-3-methylimidazolium hydrogen sulfate | [C <sub>4</sub> Mim][HSO <sub>4</sub> ]                | <i>P. aeruginosa</i> PTCC 1310    | 6250  | 12500 | Agar disk diffusion / agar well diffusion | Anti-adhesive activity <sup>a</sup> | [3] |
|                                              |                                                        | <i>S. aureus</i> PTCC 1112        | 3120  | 3120  |                                           |                                     |     |
|                                              |                                                        | <i>E. coli</i> PTCC 1338          | 3120  | 3120  |                                           |                                     |     |
|                                              |                                                        | <i>B. cereus</i> PTCC 1015        | 3120  | 3120  |                                           |                                     |     |
|                                              |                                                        | <i>S. typhimurium</i> (wild type) | 6250  | 6250  |                                           |                                     |     |
|                                              |                                                        | <i>K. pneumonia</i> PTCC 1290     | 3120  | 6250  |                                           |                                     |     |
|                                              |                                                        | <i>B. subtilis</i> PTCC 1715      | 3120  | 3120  |                                           |                                     |     |
| 1-Butyl-3-methylimidazolium methyl sulfate   | [C <sub>4</sub> Mim][C <sub>1</sub> OSO <sub>3</sub> ] | <i>P. aeruginosa</i> PTCC 1310    | 12500 | 12500 | Agar disk diffusion / agar well diffusion | Anti-adhesive activity <sup>a</sup> | [3] |
|                                              |                                                        | <i>S. aureus</i> PTCC 1112        | 12500 | 12500 |                                           |                                     |     |
|                                              |                                                        | <i>E. coli</i> PTCC 1338          | 12500 | 12500 |                                           |                                     |     |
|                                              |                                                        | <i>B. cereus</i> PTCC 1015        | 12500 | 12500 |                                           |                                     |     |
|                                              |                                                        | <i>S. typhimurium</i> (wild type) | 12500 | 12500 |                                           |                                     |     |
|                                              |                                                        | <i>K. pneumonia</i> PTCC 1290     | 12500 | 50000 |                                           |                                     |     |
|                                              |                                                        | <i>B. subtilis</i> PTCC 1715      | 12500 | 12500 |                                           |                                     |     |
| 1-Butyl-3-methylimidazolium tosylate         | [C <sub>4</sub> Mim][PTS]                              | <i>P. aeruginosa</i> PTCC 1310    | 25000 | 50000 | Agar disk diffusion / agar well diffusion | Anti-adhesive activity <sup>a</sup> | [3] |
|                                              |                                                        | <i>S. aureus</i> PTCC 1112        | 50000 | 50000 |                                           |                                     |     |
|                                              |                                                        | <i>E. coli</i> PTCC 1338          | 25000 | 25000 |                                           |                                     |     |
|                                              |                                                        | <i>B. cereus</i> PTCC 1015        | 50000 | 50000 |                                           |                                     |     |
|                                              |                                                        | <i>S. typhimurium</i> (wild type) | 25000 | 25000 |                                           |                                     |     |
|                                              |                                                        | <i>K. pneumonia</i> PTCC 1290     | 25000 | 25000 |                                           |                                     |     |
|                                              |                                                        | <i>B. subtilis</i> PTCC 1715      | 25000 | 25000 |                                           |                                     |     |
| 1-Butyl-3-methylimidazolium nitrate          | [C <sub>4</sub> Mim][NO <sub>3</sub> ]                 | <i>P. aeruginosa</i> PTCC 1310    | 12500 | 50000 | Agar disk diffusion / agar well diffusion | Anti-adhesive activity <sup>a</sup> | [3] |
|                                              |                                                        | <i>S. aureus</i> PTCC 1112        | 12500 | 12500 |                                           |                                     |     |
|                                              |                                                        | <i>E. coli</i> PTCC 1338          | 12500 | 12500 |                                           |                                     |     |
|                                              |                                                        | <i>B. cereus</i> PTCC 1015        | 50000 | 50000 |                                           |                                     |     |
|                                              |                                                        | <i>S. typhimurium</i> (wild type) | 12500 | 12500 |                                           |                                     |     |
|                                              |                                                        | <i>K. pneumonia</i> PTCC 1290     | 25000 | 25000 |                                           |                                     |     |
|                                              |                                                        | <i>B. subtilis</i> PTCC 1715      | 50000 | 50000 |                                           |                                     |     |
| 1-Butyl-3-methylimidazolium dicyanamide      | [C <sub>4</sub> Mim][N(CN) <sub>2</sub> ]              | <i>P. aeruginosa</i> PTCC 1310    | 25000 | 25000 | Agar disk diffusion / agar well diffusion | Anti-adhesive activity <sup>a</sup> | [3] |
|                                              |                                                        | <i>S. aureus</i> PTCC 1112        | 25000 | 25000 |                                           |                                     |     |
|                                              |                                                        | <i>E. coli</i> PTCC 1338          | 25000 | 25000 |                                           |                                     |     |
|                                              |                                                        | <i>B. cereus</i> PTCC 1015        | 25000 | 25000 |                                           |                                     |     |
|                                              |                                                        | <i>S. typhimurium</i> (wild type) | 25000 | 25000 |                                           |                                     |     |
|                                              |                                                        | <i>K. pneumonia</i> PTCC 1290     | 25000 | 25000 |                                           |                                     |     |

|                                         |                           |                                   |               |               |                                                                |                                     |        |
|-----------------------------------------|---------------------------|-----------------------------------|---------------|---------------|----------------------------------------------------------------|-------------------------------------|--------|
|                                         |                           | <i>B. subtilis</i> PTCC 1715      | 25000         | 25000         |                                                                |                                     |        |
| 1-Butyl-3-methylimidazolium thiocyanate | [C <sub>4</sub> Mim][SCN] | <i>P. aeruginosa</i> PTCC 1310    | 6250          | 6250          | Agar disk diffusion / agar well diffusion                      | Anti-adhesive activity <sup>a</sup> | [3]    |
|                                         |                           | <i>S. aureus</i> PTCC 1112        | 3120          | 3120          |                                                                |                                     |        |
|                                         |                           | <i>E. coli</i> PTCC 1338          | 6250          | 6250          |                                                                |                                     |        |
|                                         |                           | <i>B. cereus</i> PTCC 1015        | 25000         | 25000         |                                                                |                                     |        |
|                                         |                           | <i>S. typhimurium</i> (wild type) | 6250          | 12500         |                                                                |                                     |        |
|                                         |                           | <i>K. pneumonia</i> PTCC 1290     | 6250          | 6250          |                                                                |                                     |        |
|                                         |                           | <i>B. subtilis</i> PTCC 1715      | 25000         | 25000         |                                                                |                                     |        |
| 1-Hexyl-3-methylimidazolium chloride    | [C <sub>6</sub> Mim][Cl]  | <i>S. aureus</i>                  | 1560          | 1560          | Agar disk diffusion / agar well diffusion, broth microdilution | Anti-adhesive activity <sup>a</sup> | [4, 5] |
|                                         |                           | <i>S. aureus</i> ATCC 29213       | >1644 $\mu$ M | >1644 $\mu$ M |                                                                |                                     |        |
|                                         |                           | <i>E-MRSA 15</i>                  | >1644 $\mu$ M | >1644 $\mu$ M |                                                                |                                     |        |
|                                         |                           | <i>MRSA</i> (clinical strain 201) | >1644 $\mu$ M | >1644 $\mu$ M |                                                                |                                     |        |
|                                         |                           | <i>S. aureus</i> ATCC 6538        | 833           |               |                                                                |                                     |        |
|                                         |                           | <i>K. pneumoniae</i>              | 3120          | 3120          |                                                                |                                     |        |
|                                         |                           | <i>S. typhimurium</i>             | 6250          | 6250          |                                                                |                                     |        |
|                                         |                           | <i>S. typhimurium</i> ATCC 14028  | 5000          |               |                                                                |                                     |        |
|                                         |                           | <i>P. aeruginosa</i>              | 6250          | 12500         |                                                                |                                     |        |
|                                         |                           | <i>P. aeruginosa</i> PA01         | >1644 $\mu$ M | >1644 $\mu$ M |                                                                |                                     |        |
|                                         |                           | <i>E. coli</i>                    | 3120          | 3120          |                                                                |                                     |        |
|                                         |                           | <i>E. coli</i> ATCC 27325         | >1644 $\mu$ M | >1644 $\mu$ M |                                                                |                                     |        |
|                                         |                           | <i>E. coli</i> ATCC 25922         | 1250          |               |                                                                |                                     |        |
|                                         |                           | <i>B. tequilensis</i>             | 6250          | 6250          |                                                                |                                     |        |
|                                         |                           | <i>B. subtilis</i>                | 6250          | 12500         |                                                                |                                     |        |
|                                         |                           | <i>S. epidermidis</i> ATCC 12228  | >1644 $\mu$ M | >1644 $\mu$ M |                                                                |                                     |        |
|                                         |                           | <i>S. epidermidis</i> ATCC 35984  | >1644 $\mu$ M | >1644 $\mu$ M |                                                                |                                     |        |
|                                         |                           | <i>K. aerogenes</i> NCTC 7427     | >1644 $\mu$ M | >1644 $\mu$ M |                                                                |                                     |        |
|                                         |                           | <i>B. cenocepacia</i> J2315       | >1644 $\mu$ M | >1644 $\mu$ M |                                                                |                                     |        |
|                                         |                           | <i>P. mirabilis</i> NCTC 12442    | >1644 $\mu$ M | >1644 $\mu$ M |                                                                |                                     |        |

|                                                                         |                                         |                                   |               |               |                                           |                                     |     |
|-------------------------------------------------------------------------|-----------------------------------------|-----------------------------------|---------------|---------------|-------------------------------------------|-------------------------------------|-----|
|                                                                         |                                         | <i>C. tropicalis</i> NCTC 7393    | >1644 $\mu$ M | >1644 $\mu$ M |                                           |                                     |     |
|                                                                         |                                         | <i>L. monocytogenes</i> ATCC13932 | 3750          |               |                                           |                                     |     |
|                                                                         |                                         | <i>B. cereus</i> ATCC 11778       | 5000          |               |                                           |                                     |     |
|                                                                         |                                         | <i>E. faecalis</i> ATCC 19433     | 4167          |               |                                           |                                     |     |
|                                                                         |                                         | <i>L. sakei</i> ATCC 15521        | 208           |               |                                           |                                     |     |
|                                                                         |                                         | <i>L. lactis</i> ATCC 19435       | 625           |               |                                           |                                     |     |
|                                                                         |                                         | <i>C. freundii</i> ATCC 27853     | 3333          |               |                                           |                                     |     |
| 1-Hexyl-3-methylimidazolium iodide                                      | [C <sub>6</sub> Mim][I]                 | <i>S. aureus</i>                  | 780           | 780           | Agar disk diffusion / agar well diffusion | Anti-adhesive activity <sup>a</sup> | [4] |
|                                                                         |                                         | <i>K. pneumoniae</i>              | 6250          | 6250          |                                           |                                     |     |
|                                                                         |                                         | <i>S. typhimurium</i>             | 6250          | 12500         |                                           |                                     |     |
|                                                                         |                                         | <i>P. aeruginosa</i>              | 1560          | 1560          |                                           |                                     |     |
|                                                                         |                                         | <i>E. coli</i>                    | 1560          | 6250          |                                           |                                     |     |
|                                                                         |                                         | <i>B. tequilensis</i>             | 12500         | 12500         |                                           |                                     |     |
|                                                                         |                                         | <i>B. subtilis</i>                | 3120          | 3120          |                                           |                                     |     |
| 1-Hexyl-3-methylimidazolium hexafluorophosphate                         | [C <sub>6</sub> Mim][PF <sub>6</sub> ]  | <i>S. aureus</i>                  | 3120          | 3120          | Agar disk diffusion / agar well diffusion | Anti-adhesive activity <sup>a</sup> | [4] |
|                                                                         |                                         | <i>K. pneumoniae</i>              | 25000         | 25000         |                                           |                                     |     |
|                                                                         |                                         | <i>S. typhimurium</i>             | 25000         | 25000         |                                           |                                     |     |
|                                                                         |                                         | <i>P. aeruginosa</i>              | 25000         | 25000         |                                           |                                     |     |
|                                                                         |                                         | <i>E. coli</i>                    | 12500         | 12500         |                                           |                                     |     |
|                                                                         |                                         | <i>B. tequilensis</i>             | 25000         | 25000         |                                           |                                     |     |
|                                                                         |                                         | <i>B. subtilis</i>                | 50000         | 50000         |                                           |                                     |     |
| 1-Hexyl-3-methylimidazolium tetrafluoroborate                           | [C <sub>6</sub> Mim][BF <sub>4</sub> ]  | <i>S. aureus</i>                  | 1560          | 1560          | Agar disk diffusion / agar well diffusion | Anti-adhesive activity <sup>a</sup> | [4] |
|                                                                         |                                         | <i>K. pneumoniae</i>              | 3120          | 6250          |                                           |                                     |     |
|                                                                         |                                         | <i>S. typhimurium</i>             | 6250          | 6250          |                                           |                                     |     |
|                                                                         |                                         | <i>P. aeruginosa</i>              | 6250          | 6250          |                                           |                                     |     |
|                                                                         |                                         | <i>E. coli</i>                    | 6250          | 6250          |                                           |                                     |     |
|                                                                         |                                         | <i>B. tequilensis</i>             | 6250          | 6250          |                                           |                                     |     |
|                                                                         |                                         | <i>B. subtilis</i>                | 6250          | 6250          |                                           |                                     |     |
| 1-Hexyl-3-methylimidazolium bis(trifluoromethylsulfonyl)trifluoroborate | [C <sub>6</sub> Mim][NTf <sub>2</sub> ] | <i>S. aureus</i>                  | 780           | 780           | Agar disk diffusion / Agar well diffusion | Anti-adhesive activity <sup>a</sup> | [4] |
|                                                                         |                                         | <i>K. pneumoniae</i>              | 12500         | 12500         |                                           |                                     |     |
|                                                                         |                                         | <i>S. typhimurium</i>             | 12500         | 12500         |                                           |                                     |     |

|                                      |                                        |                                   |                          |          |                                           |                                     |     |
|--------------------------------------|----------------------------------------|-----------------------------------|--------------------------|----------|-------------------------------------------|-------------------------------------|-----|
| lfonyl)imide                         |                                        | <i>P. aeruginosa</i>              | 25000                    | 25000    |                                           |                                     |     |
|                                      |                                        | <i>E. coli</i>                    | 6250                     | 6250     |                                           |                                     |     |
|                                      |                                        | <i>B. tequilensis</i>             | 6250                     | 6250     |                                           |                                     |     |
|                                      |                                        | <i>B. subtilis</i>                | 3120                     | 3120     |                                           |                                     |     |
| 1-Hexyl-3-methylimidazolium tosylate | [C <sub>6</sub> Mim][PT S]             | <i>S. aureus</i>                  | 6250                     | 6250     | Agar disk diffusion / agar well diffusion | Anti-adhesive activity <sup>a</sup> | [4] |
|                                      |                                        | <i>K. pneumoniae</i>              | 6250                     | 6250     |                                           |                                     |     |
|                                      |                                        | <i>S. typhimurium</i>             | 25000                    | 25000    |                                           |                                     |     |
|                                      |                                        | <i>P. aeruginosa</i>              | 12500                    | 12500    |                                           |                                     |     |
|                                      |                                        | <i>E. coli</i>                    | 3120                     | 12500    |                                           |                                     |     |
|                                      |                                        | <i>B. tequilensis</i>             | 6250                     | 12500    |                                           |                                     |     |
|                                      |                                        | <i>B. subtilis</i>                | 12500                    | 12500    |                                           |                                     |     |
|                                      |                                        |                                   |                          |          |                                           |                                     |     |
| 1-Hexyl-3-methylimidazolium nitrate  | [C <sub>6</sub> Mim][NO <sub>3</sub> ] | <i>S. aureus</i>                  | 780                      | 780      | Agar disk diffusion / agar well diffusion | Anti-adhesive activity <sup>a</sup> | [4] |
|                                      |                                        | <i>K. pneumoniae</i>              | 3120                     | 3120     |                                           |                                     |     |
|                                      |                                        | <i>S. typhimurium</i>             | 3120                     | 3120     |                                           |                                     |     |
|                                      |                                        | <i>P. aeruginosa</i>              | 6250                     | 6250     |                                           |                                     |     |
|                                      |                                        | <i>E. coli</i>                    | 780                      | 780      |                                           |                                     |     |
|                                      |                                        | <i>B. tequilensis</i>             | 1560                     | 1560     |                                           |                                     |     |
|                                      |                                        | <i>B. subtilis</i>                | 3120                     | 3120     |                                           |                                     |     |
| 1-Octyl-3-methylimidazolium chloride | [C <sub>8</sub> Mim][Cl]               | <i>S. aureus</i> ATCC 29213       | 722 µM (MBEC 2708 µM)    | >1444 µM | Broth microdilution, MBEC assay           |                                     | [5] |
|                                      |                                        | <i>E-MRSA 15</i>                  | 722 µM (MBEC 2708 µM)    | >1444 µM |                                           |                                     |     |
|                                      |                                        | <i>MRSA</i> (clinical strain 201) | 1444 µM (MBEC 21666 µM)  | >1444 µM |                                           |                                     |     |
|                                      |                                        | <i>S. epidermidis</i> ATCC 12228  | 361 µM                   | 1444 µM  |                                           |                                     |     |
|                                      |                                        | <i>S. epidermidis</i> ATCC 35984  | 722 µM (MBEC 10833 µM)   | 1444 µM  |                                           |                                     |     |
|                                      |                                        | <i>E. coli</i> NCTC 8196          | 722 µM (MBEC 21666 µM)   | 1444 µM  |                                           |                                     |     |
|                                      |                                        | <i>P. aeruginosa</i> PA01         | >1444 µM (MBEC 21666 µM) | >1444 µM |                                           |                                     |     |
|                                      |                                        | <i>K. aerogenes</i> NCTC 7427     | 1444 µM (MBEC 43331 µM)  | >1444 µM |                                           |                                     |     |
|                                      |                                        | <i>B. cenocepacia</i> J2315       | >1444 µM                 | >1444 µM |                                           |                                     |     |

|                                                   |                                         |                                 |                                                 |                     |                                           |                                                                                |     |
|---------------------------------------------------|-----------------------------------------|---------------------------------|-------------------------------------------------|---------------------|-------------------------------------------|--------------------------------------------------------------------------------|-----|
|                                                   |                                         |                                 | (MBEC 43331 $\mu\text{M}$ )                     |                     |                                           |                                                                                |     |
|                                                   |                                         | <i>P. mirabilis</i> NCTC 12442  | 1444 $\mu\text{M}$ (MBEC 43331 $\mu\text{M}$ )  | >1444 $\mu\text{M}$ |                                           |                                                                                |     |
|                                                   |                                         | <i>C. tropicalis</i> NCTC 7393  | 1444 $\mu\text{M}$ (MBEC >43331 $\mu\text{M}$ ) | >1444 $\mu\text{M}$ |                                           |                                                                                |     |
| 1-Hexyl-2,3-dimethylimidazolium tetrafluoroborate | [C <sub>6</sub> MMim][BF <sub>4</sub> ] | <i>S. aureus</i>                | 3120                                            | 3120                | Agar disk diffusion / agar well diffusion | Anti-adhesive activity <sup>a</sup>                                            | [4] |
|                                                   |                                         | <i>K. pneumoniae</i>            | 6250                                            | 6250                |                                           |                                                                                |     |
|                                                   |                                         | <i>S. typhimurium</i>           | 12500                                           | 12500               |                                           |                                                                                |     |
|                                                   |                                         | <i>P. aeruginosa</i>            | 3120                                            | 6250                |                                           |                                                                                |     |
|                                                   |                                         | <i>E. coli</i>                  | 1560                                            | 3120                |                                           |                                                                                |     |
|                                                   |                                         | <i>B. tequilensis</i>           | 12500                                           | 12500               |                                           |                                                                                |     |
|                                                   |                                         | <i>B. subtilis</i>              | 6250                                            | 6250                |                                           |                                                                                |     |
| <i>N</i> -Butylpyridinium nitrate                 | [C <sub>4</sub> Py][NO <sub>3</sub> ]   | <i>S. aureus</i>                | 6250                                            | 6250                | Agar disk diffusion / agar well diffusion | Anti-adhesive activity <sup>a</sup>                                            | [4] |
|                                                   |                                         | <i>K. pneumoniae</i>            | 50000                                           | 50000               |                                           |                                                                                |     |
|                                                   |                                         | <i>S. typhimurium</i>           | 50000                                           | 50000               |                                           |                                                                                |     |
|                                                   |                                         | <i>P. aeruginosa</i>            | 6250                                            | 12500               |                                           |                                                                                |     |
|                                                   |                                         | <i>E. coli</i>                  | 25000                                           | 25000               |                                           |                                                                                |     |
|                                                   |                                         | <i>B. tequilensis</i>           | 50000                                           | 50000               |                                           |                                                                                |     |
|                                                   |                                         | <i>B. subtilis</i>              | 12500                                           | 25000               |                                           |                                                                                |     |
| <i>N</i> -Hexylpyridinium nitrate                 | [C <sub>6</sub> Py][NO <sub>3</sub> ]   | <i>S. aureus</i>                | 1560                                            | 1560                | Agar disk diffusion / agar well diffusion | Best anti-adhesive activity among the ILs tested in the current work.          | [4] |
|                                                   |                                         | <i>K. pneumoniae</i>            | 6250                                            | 6250                |                                           |                                                                                |     |
|                                                   |                                         | <i>S. typhimurium</i>           | 6250                                            | 6250                |                                           |                                                                                |     |
|                                                   |                                         | <i>P. aeruginosa</i>            | 3120                                            | 3120                |                                           |                                                                                |     |
|                                                   |                                         | <i>E. coli</i>                  | 1560                                            | 1560                |                                           |                                                                                |     |
|                                                   |                                         | <i>B. tequilensis</i>           | 3120                                            | 6250                |                                           |                                                                                |     |
|                                                   |                                         | <i>B. subtilis</i>              | 3120                                            | 3120                |                                           |                                                                                |     |
| <i>N</i> -Octylpyridinium bromide                 | [C <sub>8</sub> Py][Br]                 | <i>M. luteus</i> ATCC 9341      | R                                               |                     | Broth microdilution                       | R, resistant at the highest concentration tested (256 $\mu\text{g mL}^{-1}$ ). | [6] |
|                                                   |                                         | <i>S. epidermidis</i> ATCC155-1 | 940 $\mu\text{M}$                               |                     |                                           |                                                                                |     |
|                                                   |                                         | <i>S. aureus</i> ATCC 25178     | R                                               |                     |                                           |                                                                                |     |
|                                                   |                                         | <i>E. coli</i> ATCC 27325       | R                                               |                     |                                           |                                                                                |     |
|                                                   |                                         | <i>K. pneumonia</i> ATCC 9721   | R                                               |                     |                                           |                                                                                |     |
|                                                   |                                         | <i>P. aeruginosa</i> ATCC 9721  | R                                               |                     |                                           |                                                                                |     |



|                                                         |                                          |                                   |          |  |                     |                                                                              |     |
|---------------------------------------------------------|------------------------------------------|-----------------------------------|----------|--|---------------------|------------------------------------------------------------------------------|-----|
|                                                         |                                          | <i>C. albicans</i> ATCC10231      | R        |  |                     |                                                                              |     |
|                                                         |                                          | <i>B. subtilis</i> ATCC6633       | R        |  |                     |                                                                              |     |
| <i>N</i> -Decylpyridinium bromide                       | [C <sub>10</sub> Py][Br]                 | <i>M. luteus</i> ATCC 9341        | R        |  | Broth microdilution | R, resistant at the highest concentration tested (256 µg mL <sup>-1</sup> ). | [6] |
|                                                         |                                          | <i>S. epidermidis</i> ATCC155-1   | 428 µM   |  |                     |                                                                              |     |
|                                                         |                                          | <i>S. aureus</i> ATCC 25178       | 428 µM   |  |                     |                                                                              |     |
|                                                         |                                          | <i>E. coli</i> ATCC 27325         | 428 µM   |  |                     |                                                                              |     |
|                                                         |                                          | <i>K. pneumonia</i> ATCC 9721     | R        |  |                     |                                                                              |     |
|                                                         |                                          | <i>P. aeruginosa</i> ATCC 9721    | R        |  |                     |                                                                              |     |
|                                                         |                                          | <i>C. albicans</i> ATCC10231      | R        |  |                     |                                                                              |     |
|                                                         |                                          | <i>B. subtilis</i> ATCC6633       | 428 µM   |  |                     |                                                                              |     |
| <i>N</i> -Butyl- <i>N</i> -methylpyrrolidinium chloride | [C <sub>4</sub> C <sub>1</sub> Pyr][Cl]  | <i>L. monocytogenes</i> ATCC13932 | 5000     |  | Broth microdilution |                                                                              | [1] |
|                                                         |                                          | <i>B. cereus</i> ATCC 11778       | 5000     |  |                     |                                                                              |     |
|                                                         |                                          | <i>S. aureus</i> ATCC 6538        | 5000     |  |                     |                                                                              |     |
|                                                         |                                          | <i>E. faecalis</i> ATCC 19433     | 5000     |  |                     |                                                                              |     |
|                                                         |                                          | <i>L. sakei</i> ATCC 15521        | 3333     |  |                     |                                                                              |     |
|                                                         |                                          | <i>L. lactis</i> ATCC 19435       | 4167     |  |                     |                                                                              |     |
|                                                         |                                          | <i>S. typhimurium</i> ATCC 14028  | >5000    |  |                     |                                                                              |     |
|                                                         |                                          | <i>E. coli</i> ATCC 25922         | 5000     |  |                     |                                                                              |     |
|                                                         |                                          | <i>C. freundii</i> ATCC 27853     | >5000    |  |                     |                                                                              |     |
| <i>N</i> -Butyl- <i>N</i> -methylpyrrolidinium bromide  | [C <sub>4</sub> C <sub>1</sub> Pyr][Br]  | <i>S. aureus</i>                  | 64505 µM |  | Broth microdilution |                                                                              | [7] |
|                                                         |                                          | <i>E. coli</i>                    | 83333 µM |  |                     |                                                                              |     |
| <i>N</i> -Hexyl- <i>N</i> -methylpyrrolidinium bromide  | [C <sub>6</sub> C <sub>1</sub> Pyr][Br]  | <i>S. aureus</i>                  | 14920 µM |  | Broth microdilution |                                                                              | [7] |
|                                                         |                                          | <i>E. coli</i>                    | 2988 µM  |  |                     |                                                                              |     |
| <i>N</i> -Octyl- <i>N</i> -methylpyrrolidinium bromide  | [C <sub>8</sub> C <sub>1</sub> Pyr][Br]  | <i>S. aureus</i>                  | 1808 µM  |  | Broth microdilution |                                                                              | [7] |
|                                                         |                                          | <i>E. coli</i>                    | 1899 µM  |  |                     |                                                                              |     |
| <i>N</i> -Decyl- <i>N</i> -methylpyrrolidinium bromide  | [C <sub>10</sub> C <sub>1</sub> Pyr][Br] | <i>S. aureus</i>                  | 559 µM   |  | Broth microdilution |                                                                              | [7] |
|                                                         |                                          | <i>E. coli</i>                    | 622 µM   |  |                     |                                                                              |     |
| Triethylmethylammonium chloride                         | [C <sub>2,2,2,1</sub> N][Cl]             | <i>L. monocytogenes</i> ATCC13932 | >5000    |  | Broth microdilution |                                                                              | [1] |

|                                                |                                                           |                                          |          |  |                     |                                                                                    |     |
|------------------------------------------------|-----------------------------------------------------------|------------------------------------------|----------|--|---------------------|------------------------------------------------------------------------------------|-----|
|                                                |                                                           | <i>B. cereus</i> ATCC 11778              | >5000    |  |                     |                                                                                    |     |
|                                                |                                                           | <i>S. aureus</i> ATCC 6538               | >5000    |  |                     |                                                                                    |     |
|                                                |                                                           | <i>E. faecalis</i> ATCC 19433            | >5000    |  |                     |                                                                                    |     |
|                                                |                                                           | <i>L. sakei</i> ATCC 15521               | >5000    |  |                     |                                                                                    |     |
|                                                |                                                           | <i>L. lactis</i> ATCC 19435              | >5000    |  |                     |                                                                                    |     |
|                                                |                                                           | <i>S. typhimurium</i> ATCC 14028         | >5000    |  |                     |                                                                                    |     |
|                                                |                                                           | <i>E. coli</i> ATCC 25922                | >5000    |  |                     |                                                                                    |     |
|                                                |                                                           | <i>C. freundii</i> ATCC 27853            | >5000    |  |                     |                                                                                    |     |
| Tetraethylammonium bromide                     | [C <sub>2,2,2,2</sub> N][Br]                              | <i>E. coli</i> ATCC 25922                | >5000 µM |  | Broth microdilution | <i>E. coli</i> TEM CTX M9, CTX M2, and AmpC MOX2 are ampicillin-resistant strains. | [2] |
|                                                |                                                           | <i>E. coli</i> TEM CTX M9                | >5000 µM |  |                     |                                                                                    |     |
|                                                |                                                           | <i>E. coli</i> CTX M2                    | 2500 µM  |  |                     |                                                                                    |     |
|                                                |                                                           | <i>E. coli</i> AmpC MOX2                 | >5000 µM |  |                     |                                                                                    |     |
|                                                |                                                           | <i>K. pneumoniae</i> (clinical isolate)  | >5000 µM |  |                     |                                                                                    |     |
|                                                |                                                           | <i>S. aureus</i> ATCC 25293              | 2500 µM  |  |                     |                                                                                    |     |
|                                                |                                                           | <i>S. epidermidis</i> (clinical isolate) | >5000 µM |  |                     |                                                                                    |     |
|                                                |                                                           | <i>E. faecalis</i> (clinical isolate)    | >5000 µM |  |                     |                                                                                    |     |
| Di(2-hydroxyethyl)butyl methylammonium bromide | [(HOC <sub>2</sub> ) <sub>2</sub> C <sub>4,1</sub> N][Br] | <i>B. subtilis</i> ATCC 6633             | >500     |  | Broth microdilution |                                                                                    | [8] |
|                                                |                                                           | <i>M. smegmatis</i> ATCC 607             | N.A.     |  |                     |                                                                                    |     |
|                                                |                                                           | <i>K. pneumonia</i> ATCC 9997            | N.A.     |  |                     |                                                                                    |     |
|                                                |                                                           | <i>E. faecalis</i> ATCC 29212            | >500     |  |                     |                                                                                    |     |
|                                                |                                                           | VRE ATCC 51299                           | >500     |  |                     |                                                                                    |     |
|                                                |                                                           | <i>S. aureus</i>                         | N.A.     |  |                     |                                                                                    |     |
|                                                |                                                           | MRSA CIP 106760                          | N.A.     |  |                     |                                                                                    |     |
|                                                |                                                           | <i>E. coli</i> ATCC 25922                | N.A.     |  |                     |                                                                                    |     |
|                                                |                                                           | <i>P. aeruginosa</i> ATCC 27853          | N.A.     |  |                     |                                                                                    |     |
|                                                |                                                           | <i>C. albicans</i> ATCC 10231            | N.T.     |  |                     |                                                                                    |     |
|                                                |                                                           | <i>S. cerevisiae</i> ATCC 2601           | N.T.     |  |                     |                                                                                    |     |
| Cholinium chloride                             | [Chol][Cl]                                                | <i>E. coli</i> ATCC 25922                | >5000 µM |  | Broth microdilution | <i>E. coli</i> TEM CTX M9, CTX M2, and AmpC MOX2 are ampicillin-resistant strains. | [2] |
|                                                |                                                           | <i>E. coli</i> TEM CTX M9                | >5000 µM |  |                     |                                                                                    |     |
|                                                |                                                           | <i>E. coli</i> CTX M2                    | >5000 µM |  |                     |                                                                                    |     |
|                                                |                                                           | <i>E. coli</i> AmpC MOX2                 | >5000 µM |  |                     |                                                                                    |     |
|                                                |                                                           | <i>K. pneumoniae</i> (clinical isolate)  | >5000 µM |  |                     |                                                                                    |     |
|                                                |                                                           | <i>S. aureus</i> ATCC 25293              | 2500 µM  |  |                     |                                                                                    |     |

|            |  |                                          |                  |  |                     |                                                                                                                       |      |
|------------|--|------------------------------------------|------------------|--|---------------------|-----------------------------------------------------------------------------------------------------------------------|------|
|            |  | <i>S. epidermidis</i> (clinical isolate) | >5000 µM         |  |                     |                                                                                                                       |      |
|            |  | <i>E. faecalis</i> (clinical isolate)    | >5000 µM         |  |                     |                                                                                                                       |      |
| Gentamycin |  | <i>S. typhimurium</i> ATCC 14028         | 0.25             |  | Broth microdilution |                                                                                                                       | [9]  |
|            |  | <i>E. coli</i> ATCC 25922                | 0.25             |  |                     |                                                                                                                       |      |
|            |  | <i>C. freundii</i> ATCC 27853            | 1                |  |                     |                                                                                                                       |      |
|            |  | <i>B. subtilis</i> KCTC1914              | 1                |  |                     |                                                                                                                       |      |
|            |  | <i>S. typhimurium</i> KCTC1926           | 0.5              |  |                     |                                                                                                                       |      |
| Kanamycin  |  | <i>S. aureus</i> 209 KCTC1916            |                  |  | Broth microdilution |                                                                                                                       | [9]  |
|            |  | <i>S. aureus</i> R209 KCTC1928           |                  |  |                     |                                                                                                                       |      |
|            |  | <i>E. coli</i> KCTC1924                  |                  |  |                     |                                                                                                                       |      |
|            |  | <i>B. subtilis</i> KCTC1914              |                  |  |                     |                                                                                                                       |      |
|            |  | <i>S. typhimurium</i> KCTC1926           |                  |  |                     |                                                                                                                       |      |
| Fuconazole |  | <i>C. tropicalis</i> 17A                 | 0.125 (MBEC 4)   |  | Broth microdilution | The clinical isolates 72A, 72P, and 94P are resistant to fluconazole, amphotericin B, voriconazole and anidulafungin. | [10] |
|            |  | <i>C. tropicalis</i> 57A                 | 0.125 (MBEC 64)  |  |                     |                                                                                                                       |      |
|            |  | <i>C. tropicalis</i> 72A                 | 128 (MBEC 8)     |  |                     |                                                                                                                       |      |
|            |  | <i>C. tropicalis</i> 72P                 | 128 (MBEC 128)   |  |                     |                                                                                                                       |      |
|            |  | <i>C. tropicalis</i> 94P                 | 64 (MBEC 32)     |  |                     |                                                                                                                       |      |
|            |  | <i>C. tropicalis</i> 102A                | 0.125 (MBEC 128) |  |                     |                                                                                                                       |      |
| Colistin   |  | <i>E. coli</i> ATCC 25922                | 2                |  | Broth microdilution |                                                                                                                       | [11] |
|            |  | <i>P. aeruginosa</i> ATCC 27853          | 1                |  |                     |                                                                                                                       |      |
|            |  | <i>K. pneumonia</i> ATCC BAA-1705        | 2                |  |                     |                                                                                                                       |      |
|            |  | <i>A. baumannii</i> AB01                 | 4                |  |                     |                                                                                                                       |      |
| Vancomycin |  | <i>B. subtilis</i> ATCC 6633             | <0.48            |  | Broth microdilution |                                                                                                                       | [8]  |
|            |  | <i>K. pneumonia</i> ATCC 9997            | 15.62            |  |                     |                                                                                                                       |      |
|            |  | <i>E. faecalis</i> ATCC 29212            | 1.95             |  |                     |                                                                                                                       |      |
|            |  | VRE ATCC 51299                           | 3.91             |  |                     |                                                                                                                       |      |
|            |  | <i>S. aureus</i>                         | 7.82             |  |                     |                                                                                                                       |      |
|            |  | MRSA CIP 106760                          | 3.91             |  |                     |                                                                                                                       |      |
| Rifampicin |  | <i>M. smegmatis</i> ATCC 607             | <0.48            |  | Broth microdilution |                                                                                                                       | [8]  |

|                |  |                                 |       |  |                     |  |     |
|----------------|--|---------------------------------|-------|--|---------------------|--|-----|
|                |  | <i>E. coli</i> ATCC 25922       | 0.98  |  |                     |  |     |
| Norfloxacin    |  | <i>P. aeruginosa</i> ATCC 27853 | <0.48 |  | Broth microdilution |  | [8] |
| Amphotericin B |  | <i>C. albicans</i> ATCC 10231   | <0.48 |  | Broth microdilution |  | [8] |
|                |  | <i>S. cerevisiae</i> ATCC 2601  | <0.48 |  |                     |  |     |

<sup>a</sup> IZ, inhibition zone; MIC, minimum inhibitory concentration; MBC, minimum bactericidal concentration; MBEC, minimum biofilm eradication concentration; MRSA, methicillin-resistant *S. aureus*; N.A., not active; N.D., not determined; N.T., not tested; VRE, vancomycin-resistant *E. faecalis*.

<sup>a</sup> Anti-adhesive activity varies depending on the species.

**Table S2.** Antimicrobial activity of API-ILs\*

| IL                                                   | Acronym                     | Species                                  | IZ, mm | MIC $\mu\text{g mL}^{-1}$ | MBC, $\mu\text{g mL}^{-1}$ | Method              | Notes                                                                              | Ref. |
|------------------------------------------------------|-----------------------------|------------------------------------------|--------|---------------------------|----------------------------|---------------------|------------------------------------------------------------------------------------|------|
| 1-Ethyl-3-methylimidazolium ampicillinate            | [C <sub>2</sub> Mim][Amp]   | <i>E. coli</i> ATCC 25922                |        | >5000 $\mu\text{M}$       |                            | Broth microdilution | <i>E. coli</i> TEM CTX M9, CTX M2, and AmpC MOX2 are ampicillin-resistant strains. | [2]  |
|                                                      |                             | <i>E. coli</i> TEM CTX M9                |        | >5000 $\mu\text{M}$       |                            |                     |                                                                                    |      |
|                                                      |                             | <i>E. coli</i> CTX M2                    |        | >5000 $\mu\text{M}$       |                            |                     |                                                                                    |      |
|                                                      |                             | <i>E. coli</i> AmpC MOX2                 |        | >5000 $\mu\text{M}$       |                            |                     |                                                                                    |      |
|                                                      |                             | <i>K. pneumoniae</i> (clinical isolate)  |        | >5000 $\mu\text{M}$       |                            |                     |                                                                                    |      |
|                                                      |                             | <i>S. aureus</i> ATCC 25293              |        | >5000 $\mu\text{M}$       |                            |                     |                                                                                    |      |
|                                                      |                             | <i>S. epidermidis</i> (clinical isolate) |        | >5000 $\mu\text{M}$       |                            |                     |                                                                                    |      |
|                                                      |                             | <i>E. faecalis</i> (clinical isolate)    |        | >5000 $\mu\text{M}$       |                            |                     |                                                                                    |      |
| 1-(2-Hydroxyethyl)-3-methylimidazolium ampicillinate | [HOC <sub>2</sub> Mim][Amp] | <i>E. coli</i> ATCC 25922                |        | 5000 $\mu\text{M}$        |                            | Broth microdilution | <i>E. coli</i> TEM CTX M9, CTX M2, and AmpC MOX2 are ampicillin-resistant strains. | [2]  |
|                                                      |                             | <i>E. coli</i> TEM CTX M9                |        | >5000 $\mu\text{M}$       |                            |                     |                                                                                    |      |
|                                                      |                             | <i>E. coli</i> CTX M2                    |        | >5000 $\mu\text{M}$       |                            |                     |                                                                                    |      |
|                                                      |                             | <i>E. coli</i> AmpC MOX2                 |        | 5000 $\mu\text{M}$        |                            |                     |                                                                                    |      |
|                                                      |                             | <i>K. pneumoniae</i> (clinical isolate)  |        | >5000 $\mu\text{M}$       |                            |                     |                                                                                    |      |
|                                                      |                             | <i>S. aureus</i> ATCC 25293              |        | >5000 $\mu\text{M}$       |                            |                     |                                                                                    |      |
|                                                      |                             | <i>S. epidermidis</i> (clinical isolate) |        | 2500 $\mu\text{M}$        |                            |                     |                                                                                    |      |

|                                  |                               |                                          |    |               |  |                                          |                                                                                                                             |      |
|----------------------------------|-------------------------------|------------------------------------------|----|---------------|--|------------------------------------------|-----------------------------------------------------------------------------------------------------------------------------|------|
|                                  |                               | <i>E. faecalis</i> (clinical isolate)    |    | 5000 $\mu$ M  |  |                                          |                                                                                                                             |      |
| Tetraethylammonium ampicillinate | [C <sub>2,2,2,2</sub> N][Amp] | <i>E. coli</i> ATCC 25922                |    | >5000 $\mu$ M |  | Broth microdilution                      | <i>E. coli</i> TEM CTX M9, CTX M2, and AmpC MOX2 are ampicillin-resistant strains.                                          | [2]  |
|                                  |                               | <i>E. coli</i> TEM CTX M9                |    | >5000 $\mu$ M |  |                                          |                                                                                                                             |      |
|                                  |                               | <i>E. coli</i> CTX M2                    |    | >5000 $\mu$ M |  |                                          |                                                                                                                             |      |
|                                  |                               | <i>E. coli</i> AmpC MOX2                 |    | >5000 $\mu$ M |  |                                          |                                                                                                                             |      |
|                                  |                               | <i>K. pneumoniae</i> (clinical isolate)  |    | >5000 $\mu$ M |  |                                          |                                                                                                                             |      |
|                                  |                               | <i>S. aureus</i> ATCC 25293              |    | >5000 $\mu$ M |  |                                          |                                                                                                                             |      |
|                                  |                               | <i>S. epidermidis</i> (clinical isolate) |    | >5000 $\mu$ M |  |                                          |                                                                                                                             |      |
|                                  |                               | <i>E. faecalis</i> (clinical isolate)    |    | >5000 $\mu$ M |  |                                          |                                                                                                                             |      |
| Cholinium ampicillinate          | [Chol][Amp]                   | <i>E. coli</i> ATCC 25922                |    | >5000 $\mu$ M |  | Broth microdilution                      | <i>E. coli</i> TEM CTX M9, CTX M2, and AmpC MOX2 are ampicillin-resistant strains.                                          | [2]  |
|                                  |                               | <i>E. coli</i> TEM CTX M9                |    | >5000 $\mu$ M |  |                                          |                                                                                                                             |      |
|                                  |                               | <i>E. coli</i> CTX M2                    |    | >5000 $\mu$ M |  |                                          |                                                                                                                             |      |
|                                  |                               | <i>E. coli</i> AmpC MOX2                 |    | >5000 $\mu$ M |  |                                          |                                                                                                                             |      |
|                                  |                               | <i>K. pneumoniae</i> (clinical isolate)  |    | >5000 $\mu$ M |  |                                          |                                                                                                                             |      |
|                                  |                               | <i>S. aureus</i> ATCC 25293              |    | >5000 $\mu$ M |  |                                          |                                                                                                                             |      |
|                                  |                               | <i>S. epidermidis</i> (clinical isolate) |    | >5000 $\mu$ M |  |                                          |                                                                                                                             |      |
|                                  |                               | <i>E. faecalis</i> (clinical isolate)    |    | >5000 $\mu$ M |  |                                          |                                                                                                                             |      |
| Nalidixic acid                   |                               | <i>E. coli</i> BW25113 (wild-type)       | 11 |               |  | Disk diffusion test, 10 $\mu$ g per disk | Deletions $\Delta$ rfaC, $\Delta$ rfaL, and $\Delta$ rfaG affect the cell surface hydrophobicity and membrane permeability. | [12] |
|                                  |                               | <i>E. coli</i> JW3596 ( $\Delta$ rfaC)   | 20 |               |  |                                          |                                                                                                                             |      |
|                                  |                               | <i>E. coli</i> JW3597 ( $\Delta$ rfaL)   | 11 |               |  |                                          |                                                                                                                             |      |
|                                  |                               | <i>E. coli</i> JW3606 ( $\Delta$ rfaG)   | 18 |               |  |                                          |                                                                                                                             |      |
| Ampicillin sodium                |                               | <i>S. aureus</i> ATCC 6538               |    | 27 $\mu$ M    |  | Broth microdilution                      | <i>E. coli</i> TEM CTX                                                                                                      | [2,  |

|                       |  |                                          |  |          |          |                                    |                                                             |         |
|-----------------------|--|------------------------------------------|--|----------|----------|------------------------------------|-------------------------------------------------------------|---------|
| salt                  |  | <i>S. aureus</i> ATCC 25293              |  | 5 µM     |          |                                    | M9, CTX M2, and AmpC MOX2 are ampicillin-resistant strains. | 13]     |
|                       |  | <i>S. epidermidis</i> (clinical isolate) |  | 50 µM    |          |                                    |                                                             |         |
|                       |  | <i>E. coli</i> O157:H7 ATCC 43895        |  | 12 µM    |          |                                    |                                                             |         |
|                       |  | <i>E. coli</i> ATCC 25922                |  | 50 µM    |          |                                    |                                                             |         |
|                       |  | <i>E. coli</i> TEM CTX M9                |  | >5000 µM |          |                                    |                                                             |         |
|                       |  | <i>E. coli</i> CTX M2                    |  | >5000 µM |          |                                    |                                                             |         |
|                       |  | <i>E. coli</i> AmpC MOX2                 |  | >5000 µM |          |                                    |                                                             |         |
|                       |  | <i>E. faecium</i> ATCC 49474             |  | 17 µM    |          |                                    |                                                             |         |
|                       |  | <i>E. faecalis</i> (clinical isolate)    |  | 50 µM    |          |                                    |                                                             |         |
|                       |  | <i>K. pneumonia</i> ATCC 4352            |  | 20 µM    |          |                                    |                                                             |         |
|                       |  | <i>K. pneumoniae</i> (clinical isolate)  |  | 2500 µM  |          |                                    |                                                             |         |
| Benzalkonium chloride |  | <i>S. aureus</i> ATCC 6538               |  | 2 ppm    | 62.5 ppm | Tube dilution, broth microdilution |                                                             | [9, 14] |
|                       |  | MRSA ATCC 43300                          |  | 2 ppm    | 31.2 ppm |                                    |                                                             |         |
|                       |  | <i>S. aureus</i> 209 KCTC1916            |  | 8        |          |                                    |                                                             |         |
|                       |  | <i>S. aureus</i> R209 KCTC1928           |  | 8        |          |                                    |                                                             |         |
|                       |  | <i>E. faecium</i> ATCC 49474             |  | 4 ppm    | 31.2 ppm |                                    |                                                             |         |
|                       |  | <i>E. coli</i> ATCC25922                 |  | 8 ppm    | 62.5 ppm |                                    |                                                             |         |
|                       |  | <i>M. luteus</i> ATCC 9341               |  | 4 ppm    | 31.2 ppm |                                    |                                                             |         |
|                       |  | <i>S. epidermidis</i> ATCC 12228         |  | 2 ppm    | 16 ppm   |                                    |                                                             |         |

|                                  |  |                                  |  |       |          |               |  |      |
|----------------------------------|--|----------------------------------|--|-------|----------|---------------|--|------|
|                                  |  | <i>K. pneumonia</i> ATCC 4352    |  | 4 ppm | 31.2 ppm |               |  |      |
|                                  |  | <i>B. subtilis</i> KCTC1914      |  | 8     |          |               |  |      |
|                                  |  | <i>C. albicans</i> ATCC 10231    |  | 8 ppm | 16 ppm   |               |  |      |
|                                  |  | <i>R. rubra</i> PhB              |  | 8 ppm | 31.2 ppm |               |  |      |
|                                  |  | <i>S. mutans</i> PCM             |  | 2 ppm | 16 ppm   |               |  |      |
| Didecyldimethylammonium chloride |  | <i>S. aureus</i> ATCC 6538       |  | 2 ppm | 31.2 ppm | Tube dilution |  | [14] |
|                                  |  | MRSA ATCC 43300                  |  | 2 ppm | 31.2 ppm |               |  |      |
|                                  |  | <i>E. faecium</i> ATCC 49474     |  | 4 ppm | 31.2 ppm |               |  |      |
|                                  |  | <i>E. coli</i> ATCC25922         |  | 8 ppm | 31.2 ppm |               |  |      |
|                                  |  | <i>M. luteus</i> ATCC 9341       |  | 2 ppm | 31.2 ppm |               |  |      |
|                                  |  | <i>S. epidermidis</i> ATCC 12228 |  | 2 ppm | 31.2 ppm |               |  |      |
|                                  |  | <i>K. pneumonia</i> ATCC 4352    |  | 4 ppm | 16 ppm   |               |  |      |
|                                  |  | <i>C. albicans</i> ATCC 10231    |  | 8 ppm | 16 ppm   |               |  |      |
|                                  |  | <i>R. rubra</i> PhB              |  | 4 ppm | 31.2 ppm |               |  |      |
|                                  |  | <i>S. mutans</i> PCM             |  | 2 ppm | 16 ppm   |               |  |      |

\* IZ, inhibition zone; MIC, minimum inhibitory concentration; MBC, minimum bactericidal concentration; MRSA, methicillin-resistant *S. aureus*.

**Table S3.** Antimicrobial activity of dicationic ILs\*

| IL                                                               | Acronym                                                                    | Species                          | IZ, mm | MIC, $\mu\text{g mL}^{-1}$ | MBC, $\mu\text{g mL}^{-1}$ | Method              | Ref. |
|------------------------------------------------------------------|----------------------------------------------------------------------------|----------------------------------|--------|----------------------------|----------------------------|---------------------|------|
| 1,1'-(Propane-1,3-diyl)bis(3-methyl-1H-imidazol-3-ium) dibromide | ([C <sub>1</sub> Im]-C <sub>3</sub> -[C <sub>1</sub> Im])[Br] <sub>2</sub> | <i>S. epidermidis</i> ATCC 35984 |        | >10000                     |                            | Broth microdilution | [15] |
|                                                                  |                                                                            | <i>S. aureus</i> ATCC 6538       |        | >10000                     |                            |                     |      |
|                                                                  |                                                                            | <i>E. coli</i> ATCC 25922        |        | 10000                      |                            |                     |      |
|                                                                  |                                                                            | <i>P. aeruginosa</i> ATCC 27853  |        | >10000                     |                            |                     |      |
|                                                                  |                                                                            | <i>E. faecalis</i> ATCC          |        | >10000                     |                            |                     |      |

|                                                                   |                                                                             |                                  |  |          |  |                     |      |
|-------------------------------------------------------------------|-----------------------------------------------------------------------------|----------------------------------|--|----------|--|---------------------|------|
|                                                                   |                                                                             | 29212                            |  |          |  |                     |      |
| 1,1'-Butane-1,4-diyl)bis(3-butyl-1H-imidazol-3-ium) dibromide     | ([C <sub>4</sub> Im]-C <sub>4</sub> -[C <sub>4</sub> Im])[Br] <sub>2</sub>  | <i>S. epidermidis</i> ATCC 35984 |  | 5000     |  | Broth microdilution | [15] |
|                                                                   |                                                                             | <i>S. aureus</i> ATCC 6538       |  | >10000   |  |                     |      |
|                                                                   |                                                                             | <i>E. coli</i> ATCC 25922        |  | >10000   |  |                     |      |
|                                                                   |                                                                             | <i>P. aeruginosa</i> ATCC 27853  |  | >10000   |  |                     |      |
|                                                                   |                                                                             | <i>E. faecalis</i> ATCC 29212    |  | 10000    |  |                     |      |
| 1,1'-(Hexane-1,6-diyl)bis(3-methyl-1H-imidazol-3-ium) dibromide   | ([C <sub>1</sub> Im]-C <sub>6</sub> -[C <sub>1</sub> Im])[Br] <sub>2</sub>  | <i>S. epidermidis</i> ATCC 35984 |  | 10000    |  | Broth microdilution | [15] |
|                                                                   |                                                                             | <i>S. aureus</i> ATCC 6538       |  | 10000    |  |                     |      |
|                                                                   |                                                                             | <i>E. coli</i> ATCC 25922        |  | >10000   |  |                     |      |
|                                                                   |                                                                             | <i>P. aeruginosa</i> ATCC 27853  |  | >10000   |  |                     |      |
|                                                                   |                                                                             | <i>E. faecalis</i> ATCC 29212    |  | >10000   |  |                     |      |
| 1,1'-(Octane-1,8-diyl)bis(3-methyl-1H-imidazol-3-ium) dibromide   | ([C <sub>1</sub> Im]-C <sub>8</sub> -[C <sub>1</sub> Im])[Br] <sub>2</sub>  | <i>S. sanguinis</i> 10556        |  | 79000 µM |  | Broth microdilution | [16] |
|                                                                   |                                                                             | <i>S. salivarius</i> 13419       |  | 79000 µM |  |                     |      |
|                                                                   |                                                                             | <i>S. mutans</i> UA159           |  | 39000 µM |  |                     |      |
|                                                                   |                                                                             | <i>S. gordonii</i> DL1.1         |  | 39000 µM |  |                     |      |
|                                                                   |                                                                             | <i>S. uberis</i> 13419           |  | 20000 µM |  |                     |      |
|                                                                   |                                                                             | <i>E. faecalis</i> V583          |  | 79000 µM |  |                     |      |
|                                                                   |                                                                             | <i>P. aeruginosa</i> PA14        |  | 79000 µM |  |                     |      |
|                                                                   |                                                                             | <i>S. epidermidis</i>            |  | 79000 µM |  |                     |      |
| 1,1'-(Octane-1,8-diyl)bis(3-methyl-1H-imidazol-3-ium) diascorbate | ([C <sub>1</sub> Im]-C <sub>8</sub> -[C <sub>1</sub> Im])[Asc] <sub>2</sub> | <i>S. sanguinis</i> 10556        |  | 79000 µM |  | Broth microdilution | [16] |
|                                                                   |                                                                             | <i>S. salivarius</i> 13419       |  | 39000 µM |  |                     |      |
|                                                                   |                                                                             | <i>S. mutans</i> UA159           |  | 39000 µM |  |                     |      |
|                                                                   |                                                                             | <i>S. gordonii</i> DL1.1         |  | 39000 µM |  |                     |      |
|                                                                   |                                                                             | <i>S. uberis</i> 13419           |  | 39000 µM |  |                     |      |



|                                                                         |                                                                               |                            |  |                |  |                     |      |
|-------------------------------------------------------------------------|-------------------------------------------------------------------------------|----------------------------|--|----------------|--|---------------------|------|
|                                                                         |                                                                               | <i>E. faecalis</i> V583    |  | 156000 $\mu$ M |  |                     |      |
|                                                                         |                                                                               | <i>P. aeruginosa</i> PA14  |  | 20000 $\mu$ M  |  |                     |      |
|                                                                         |                                                                               | <i>S. epidermidis</i>      |  | 10000 $\mu$ M  |  |                     |      |
| 1,1'-(Octane-1,8-diyl)bis(3-methyl-1H-imidazol-3-ium) diphenylalaninate | ([C <sub>1</sub> Mim]-C <sub>8</sub> -[C <sub>1</sub> Mim])[Phe] <sub>2</sub> | <i>S. sanguinis</i> 10556  |  | 20000 $\mu$ M  |  | Broth microdilution | [16] |
|                                                                         |                                                                               | <i>S. salivarius</i> 13419 |  | 20000 $\mu$ M  |  |                     |      |
|                                                                         |                                                                               | <i>S. mutans</i> UA159     |  | 10000 $\mu$ M  |  |                     |      |
|                                                                         |                                                                               | <i>S. gordonii</i> DL1.1   |  | 79000 $\mu$ M  |  |                     |      |
|                                                                         |                                                                               | <i>S. uberis</i> 13419     |  | 20000 $\mu$ M  |  |                     |      |
|                                                                         |                                                                               | <i>E. faecalis</i> V583    |  | 79000 $\mu$ M  |  |                     |      |
|                                                                         |                                                                               | <i>P. aeruginosa</i> PA14  |  | 20000 $\mu$ M  |  |                     |      |
|                                                                         |                                                                               | <i>S. epidermidis</i>      |  | 10000 $\mu$ M  |  |                     |      |
|                                                                         |                                                                               |                            |  |                |  |                     |      |
| 1,1'-(Octane-1,8-diyl)bis(3-methyl-1H-imidazol-3-ium) dileucinate       | ([C <sub>1</sub> Im]-C <sub>8</sub> -[C <sub>1</sub> Im])[Leu] <sub>2</sub>   | <i>S. sanguinis</i> 10556  |  | 39000 $\mu$ M  |  | Broth microdilution | [16] |
|                                                                         |                                                                               | <i>S. salivarius</i> 13419 |  | 20000 $\mu$ M  |  |                     |      |
|                                                                         |                                                                               | <i>S. mutans</i> UA159     |  | 10000 $\mu$ M  |  |                     |      |
|                                                                         |                                                                               | <i>S. gordonii</i> DL1.1   |  | 10000 $\mu$ M  |  |                     |      |
|                                                                         |                                                                               | <i>S. uberis</i> 13419     |  | 10000 $\mu$ M  |  |                     |      |
|                                                                         |                                                                               | <i>E. faecalis</i> V583    |  | 79000 $\mu$ M  |  |                     |      |
|                                                                         |                                                                               | <i>P. aeruginosa</i> PA14  |  | 20000 $\mu$ M  |  |                     |      |
|                                                                         |                                                                               | <i>S. epidermidis</i>      |  | 20000 $\mu$ M  |  |                     |      |
| 1,1'-(Octane-1,8-diyl)bis(3-methyl-1H-imidazol-3-ium) dihistidinate     | ([C <sub>1</sub> Mim]-C <sub>8</sub> -[C <sub>1</sub> Mim])[His] <sub>2</sub> | <i>S. sanguinis</i> 10556  |  | 20000 $\mu$ M  |  | Broth microdilution | [16] |
|                                                                         |                                                                               | <i>S. salivarius</i> 13419 |  | 20000 $\mu$ M  |  |                     |      |
|                                                                         |                                                                               | <i>S. mutans</i> UA159     |  | 20000 $\mu$ M  |  |                     |      |
|                                                                         |                                                                               | <i>S. gordonii</i> DL1.1   |  | 10000 $\mu$ M  |  |                     |      |
|                                                                         |                                                                               | <i>S. uberis</i> 13419     |  | 20000 $\mu$ M  |  |                     |      |
|                                                                         |                                                                               | <i>E. faecalis</i> V583    |  | 79000 $\mu$ M  |  |                     |      |
|                                                                         |                                                                               | <i>P. aeruginosa</i> PA14  |  | 20000 $\mu$ M  |  |                     |      |
|                                                                         |                                                                               | <i>S. epidermidis</i>      |  | 10000 $\mu$ M  |  |                     |      |
| 1,1'-(Octane-1,8-diyl)bis(3-methyl-1H-imidazol-3-ium)                   | ([C <sub>1</sub> Im]-C <sub>8</sub> -[C <sub>1</sub> Im])[Met] <sub>2</sub>   | <i>S. sanguinis</i> 10556  |  | 20000 $\mu$ M  |  | Broth microdilution | [16] |
|                                                                         |                                                                               | <i>S. salivarius</i> 13419 |  | 20000 $\mu$ M  |  |                     |      |
|                                                                         |                                                                               | <i>S. mutans</i> UA159     |  | 10000 $\mu$ M  |  |                     |      |
|                                                                         |                                                                               | <i>S. gordonii</i> DL1.1   |  | 20000 $\mu$ M  |  |                     |      |

|                                                                          |                                                                               |                            |  |               |  |                     |      |
|--------------------------------------------------------------------------|-------------------------------------------------------------------------------|----------------------------|--|---------------|--|---------------------|------|
| dimethioninate                                                           |                                                                               | <i>S. uberis</i> 13419     |  | 20000 $\mu$ M |  |                     |      |
|                                                                          |                                                                               | <i>E. faecalis</i> V583    |  | 79000 $\mu$ M |  |                     |      |
|                                                                          |                                                                               | <i>P. aeruginosa</i> PA14  |  | 20000 $\mu$ M |  |                     |      |
|                                                                          |                                                                               | <i>S. epidermidis</i>      |  | 10000 $\mu$ M |  |                     |      |
| 1,1'-(Decane-1,10-diyl)bis(3-methyl-1H-imidazol-3-ium) dibromide         | ([C <sub>1</sub> Mim]-C <sub>10</sub> -[C <sub>1</sub> Mim])[Br] <sub>2</sub> | <i>S. sanguinis</i> 10556  |  | 10000 $\mu$ M |  | Broth microdilution | [16] |
|                                                                          |                                                                               | <i>S. salivarius</i> 13419 |  | 5000 $\mu$ M  |  |                     |      |
|                                                                          |                                                                               | <i>S. mutans</i> UA159     |  | 2000 $\mu$ M  |  |                     |      |
|                                                                          |                                                                               | <i>S. gordonii</i> DL1.1   |  | 5000 $\mu$ M  |  |                     |      |
|                                                                          |                                                                               | <i>S. uberis</i> 13419     |  | 2000 $\mu$ M  |  |                     |      |
|                                                                          |                                                                               | <i>E. faecalis</i> V583    |  | 39000 $\mu$ M |  |                     |      |
|                                                                          |                                                                               | <i>P. aeruginosa</i> PA14  |  | 39000 $\mu$ M |  |                     |      |
|                                                                          |                                                                               | <i>S. epidermidis</i>      |  | 2000 $\mu$ M  |  |                     |      |
| 1,1'-(Decane-1,10-diyl)bis(3-methyl-1H-imidazol-3-ium) diascorbate       | ([C <sub>1</sub> Im]-C <sub>10</sub> -[C <sub>1</sub> Im])[Asc] <sub>2</sub>  | <i>S. sanguinis</i> 10556  |  | 20000 $\mu$ M |  | Broth microdilution | [16] |
|                                                                          |                                                                               | <i>S. salivarius</i> 13419 |  | 20000 $\mu$ M |  |                     |      |
|                                                                          |                                                                               | <i>S. mutans</i> UA159     |  | 10000 $\mu$ M |  |                     |      |
|                                                                          |                                                                               | <i>S. gordonii</i> DL1.1   |  | 20000 $\mu$ M |  |                     |      |
|                                                                          |                                                                               | <i>S. uberis</i> 13419     |  | 10000 $\mu$ M |  |                     |      |
|                                                                          |                                                                               | <i>E. faecalis</i> V583    |  | 79000 $\mu$ M |  |                     |      |
|                                                                          |                                                                               | <i>P. aeruginosa</i> PA14  |  | 20000 $\mu$ M |  |                     |      |
|                                                                          |                                                                               | <i>S. epidermidis</i>      |  | 20000 $\mu$ M |  |                     |      |
| 1,1'-(Decane-1,10-diyl)bis(3-methyl-1H-imidazol-3-ium) diphenylalaninate | ([C <sub>1</sub> Im]-C <sub>10</sub> -[C <sub>1</sub> Im])[Phe] <sub>2</sub>  | <i>S. sanguinis</i> 10556  |  | 10000 $\mu$ M |  | Broth microdilution | [16] |
|                                                                          |                                                                               | <i>S. salivarius</i> 13419 |  | 5000 $\mu$ M  |  |                     |      |
|                                                                          |                                                                               | <i>S. mutans</i> UA159     |  | 5000 $\mu$ M  |  |                     |      |
|                                                                          |                                                                               | <i>S. gordonii</i> DL1.1   |  | 5000 $\mu$ M  |  |                     |      |
|                                                                          |                                                                               | <i>S. uberis</i> 13419     |  | 2000 $\mu$ M  |  |                     |      |
|                                                                          |                                                                               | <i>E. faecalis</i> V583    |  | 5000 $\mu$ M  |  |                     |      |
|                                                                          |                                                                               | <i>P. aeruginosa</i> PA14  |  | 20000 $\mu$ M |  |                     |      |
|                                                                          |                                                                               | <i>S. epidermidis</i>      |  | 5000 $\mu$ M  |  |                     |      |
| 1,1'-(Decane-1,10-diyl)bis(3-methyl-1H-                                  | ([C <sub>1</sub> Im]-C <sub>10</sub> -[C <sub>1</sub> Im])[Leu] <sub>2</sub>  | <i>S. sanguinis</i> 10556  |  | 10000 $\mu$ M |  | Broth microdilution | [16] |
|                                                                          |                                                                               | <i>S. salivarius</i> 13419 |  | 5000 $\mu$ M  |  |                     |      |
|                                                                          |                                                                               | <i>S. mutans</i> UA159     |  | 5000 $\mu$ M  |  |                     |      |

|                                                                                      |                                                                                  |                                     |  |               |  |                     |      |
|--------------------------------------------------------------------------------------|----------------------------------------------------------------------------------|-------------------------------------|--|---------------|--|---------------------|------|
| imidazol-3-ium)<br>dileucinate                                                       |                                                                                  | <i>S. gordonii</i> DL1.1            |  | 5000 $\mu$ M  |  |                     |      |
|                                                                                      |                                                                                  | <i>S. uberis</i> 13419              |  | 5000 $\mu$ M  |  |                     |      |
|                                                                                      |                                                                                  | <i>E. faecalis</i> V583             |  | 10000 $\mu$ M |  |                     |      |
|                                                                                      |                                                                                  | <i>P. aeruginosa</i><br>PA14        |  | 20000 $\mu$ M |  |                     |      |
|                                                                                      |                                                                                  | <i>S. epidermidis</i>               |  | 2000 $\mu$ M  |  |                     |      |
| 1,1'-(Decane-<br>1,10-diyl)bis(3-<br>methyl-1H-<br>imidazol-3-ium)<br>dihistidinate  | ([C <sub>1</sub> Im]-C <sub>10</sub> -<br>[C <sub>1</sub> Im])[His] <sub>2</sub> | <i>S. sanguinis</i> 10556           |  | 10000 $\mu$ M |  | Broth microdilution | [16] |
|                                                                                      |                                                                                  | <i>S. salivarius</i> 13419          |  | 5000 $\mu$ M  |  |                     |      |
|                                                                                      |                                                                                  | <i>S. mutans</i> UA159              |  | 5000 $\mu$ M  |  |                     |      |
|                                                                                      |                                                                                  | <i>S. gordonii</i> DL1.1            |  | 5000 $\mu$ M  |  |                     |      |
|                                                                                      |                                                                                  | <i>S. uberis</i> 13419              |  | 2000 $\mu$ M  |  |                     |      |
|                                                                                      |                                                                                  | <i>E. faecalis</i> V583             |  | 20000 $\mu$ M |  |                     |      |
|                                                                                      |                                                                                  | <i>P. aeruginosa</i><br>PA14        |  | 20000 $\mu$ M |  |                     |      |
|                                                                                      |                                                                                  | <i>S. epidermidis</i>               |  | 5000 $\mu$ M  |  |                     |      |
| 1,1'-(Decane-<br>1,10-diyl)bis(3-<br>methyl-1H-<br>imidazol-3-ium)<br>dimethioninate | ([C <sub>1</sub> Im]-C <sub>10</sub> -<br>[C <sub>1</sub> Im])[Met] <sub>2</sub> | <i>S. sanguinis</i> 10556           |  | 10000 $\mu$ M |  | Broth microdilution | [16] |
|                                                                                      |                                                                                  | <i>S. salivarius</i> 13419          |  | 5000 $\mu$ M  |  |                     |      |
|                                                                                      |                                                                                  | <i>S. mutans</i> UA159              |  | 5000 $\mu$ M  |  |                     |      |
|                                                                                      |                                                                                  | <i>S. gordonii</i> DL1.1            |  | 5000 $\mu$ M  |  |                     |      |
|                                                                                      |                                                                                  | <i>S. uberis</i> 13419              |  | 5000 $\mu$ M  |  |                     |      |
|                                                                                      |                                                                                  | <i>E. faecalis</i> V583             |  | 20000 $\mu$ M |  |                     |      |
|                                                                                      |                                                                                  | <i>P. aeruginosa</i><br>PA14        |  | 20000 $\mu$ M |  |                     |      |
|                                                                                      |                                                                                  | <i>S. epidermidis</i>               |  | 2000 $\mu$ M  |  |                     |      |
| 1,1'-(Hexane-1,6-<br>diyl)bis(3-butyl-<br>1H-imidazol-3-ium)<br>dibromide            | ([C <sub>4</sub> Im]-C <sub>6</sub> -<br>[C <sub>4</sub> Im])[Br] <sub>2</sub>   | <i>S. epidermidis</i><br>ATCC 35984 |  | 2500          |  | Broth microdilution | [15] |
|                                                                                      |                                                                                  | <i>S. aureus</i> ATCC<br>6538       |  | 5000          |  |                     |      |
|                                                                                      |                                                                                  | <i>E. coli</i> ATCC<br>25922        |  | 2500          |  |                     |      |
|                                                                                      |                                                                                  | <i>P. aeruginosa</i><br>ATCC 27853  |  | >10000        |  |                     |      |
|                                                                                      |                                                                                  | <i>E. faecalis</i> ATCC<br>29212    |  | 10000         |  |                     |      |
| 1,1'-(Hexane-1,6-                                                                    | ([C <sub>1</sub> Pyr]-C <sub>6</sub> -                                           | <i>S. epidermidis</i>               |  | 10000         |  | Broth microdilution | [15] |

|                                                                                                         |                                                                                           |                                  |    |        |      |                                                       |      |
|---------------------------------------------------------------------------------------------------------|-------------------------------------------------------------------------------------------|----------------------------------|----|--------|------|-------------------------------------------------------|------|
| diyl)bis(1-methylpyrrolidin-1-ium) dibromide                                                            | [C <sub>1</sub> Pyr])[Br] <sub>2</sub>                                                    | ATCC 35984                       |    |        |      |                                                       |      |
|                                                                                                         |                                                                                           | <i>S. aureus</i> ATCC 6538       |    | >10000 |      |                                                       |      |
|                                                                                                         |                                                                                           | <i>E. coli</i> ATCC 25922        |    | >10000 |      |                                                       |      |
|                                                                                                         |                                                                                           | <i>P. aeruginosa</i> ATCC 27853  |    | >10000 |      |                                                       |      |
|                                                                                                         |                                                                                           | <i>E. faecalis</i> ATCC 29212    |    | >10000 |      |                                                       |      |
| 3,3'-(((Oxybis(ethane-2,1-diyl))bis(oxy))bis(ethane-2,1-diyl))bis(1-methyl-1H-imidazol-3-ium) dibromide | ([C <sub>1</sub> Im]-C <sub>8</sub> O <sub>3</sub> -[C <sub>1</sub> Im])[Br] <sub>2</sub> | <i>S. epidermidis</i> ATCC 35984 |    | >10000 |      | Broth microdilution                                   | [15] |
|                                                                                                         |                                                                                           | <i>S. aureus</i> ATCC 6538       |    | >10000 |      |                                                       |      |
|                                                                                                         |                                                                                           | <i>E. coli</i> ATCC 25922        |    | >10000 |      |                                                       |      |
|                                                                                                         |                                                                                           | <i>P. aeruginosa</i> ATCC 27853  |    | >10000 |      |                                                       |      |
|                                                                                                         |                                                                                           | <i>E. faecalis</i> ATCC 29212    |    | >10000 |      |                                                       |      |
| Erythromycin                                                                                            |                                                                                           | <i>S. aureus</i>                 | 24 | 0.23   | 0.23 | Disk diffusion (30 µg per well) ; broth microdilution | [17] |
|                                                                                                         |                                                                                           | <i>E. coli</i>                   | 27 | 0.23   | 0.23 |                                                       |      |
|                                                                                                         |                                                                                           | <i>K. pneumoniae</i>             | 26 | 0.23   | 0.23 |                                                       |      |
|                                                                                                         |                                                                                           | <i>P. aeruginosa</i>             | 25 | 0.23   | 0.23 |                                                       |      |
|                                                                                                         |                                                                                           | <i>P. vulgaris</i>               | 32 | 0.23   | 0.23 |                                                       |      |
| Nalidixic acid                                                                                          |                                                                                           | <i>S. aureus</i>                 | 22 | 0.23   | 0.23 | Disk diffusion (30 µg per well) ; broth microdilution | [17] |
|                                                                                                         |                                                                                           | <i>E. coli</i>                   | 22 | 0.23   | 0.23 |                                                       |      |
|                                                                                                         |                                                                                           | <i>K. pneumoniae</i>             | 27 | 0.23   | 0.23 |                                                       |      |
|                                                                                                         |                                                                                           | <i>P. aeruginosa</i>             | 21 | 0.23   | 0.23 |                                                       |      |
|                                                                                                         |                                                                                           | <i>P. vulgaris</i>               | 24 | 0.23   | 0.23 |                                                       |      |
| Amikacin                                                                                                |                                                                                           | <i>S. aureus</i>                 | 19 | 0.23   | 0.23 | Disk diffusion (30 µg per well) ; broth microdilution | [17] |
|                                                                                                         |                                                                                           | <i>E. coli</i>                   | 20 | 0.23   | 0.23 |                                                       |      |
|                                                                                                         |                                                                                           | <i>K. pneumoniae</i>             | 19 | 0.23   | 0.23 |                                                       |      |
|                                                                                                         |                                                                                           | <i>P. aeruginosa</i>             | 17 | 0.23   | 0.23 |                                                       |      |
|                                                                                                         |                                                                                           | <i>P. vulgaris</i>               | 17 | 0.23   | 0.23 |                                                       |      |

\* IZ, inhibition zone; MIC, minimum inhibitory concentration; MBC, minimum bactericidal concentration; MRSA, methicillin-resistant *S. aureus*.

## References

1. Weyhing-Zerrer, N.; Kalb, R.; Oßmer, R.; Rossmannith, P.; Mester, P., Evidence of a reverse side-chain effect of tris(pentafluoroethyl)trifluorophosphate [FAP]-based ionic liquids against pathogenic bacteria. *Ecotoxicol. Environ. Saf.* **2018**, 148, 467-472.
2. Ferraz, R.; Teixeira, V.; Rodrigues, D.; Fernandes, R.; Prudêncio, C.; Noronha, J. P.; Petrovski, Ž.; Branco, L. C., Antibacterial activity of ionic liquids based on ampicillin against resistant bacteria. *RSC Adv.* **2014**, 4, (9), 4301-4307.
3. Hajfarajollah, H.; Mokhtarani, B.; Noghabi, K. A.; Sharifi, A.; Mirzaei, M., Antibacterial and antiadhesive properties of butyl-methylimidazolium ionic liquids toward pathogenic bacteria. *RSC Adv.* **2014**, 4, (80), 42751-42757.
4. Anvari, S.; Hajfarajollah, H.; Mokhtarani, B.; Enayati, M.; Sharifi, A.; Mirzaei, M., Antibacterial and anti-adhesive properties of ionic liquids with various cationic and anionic heads toward pathogenic bacteria. *J. Mol. Liq.* **2016**, 221, 685-690.
5. Carson, L.; Chau, P. K. W.; Earle, M. J.; Gilea, M. A.; Gilmore, B. F.; Gorman, S. P.; McCann, M. T.; Seddon, K. R., Antibiofilm activities of 1-alkyl-3-methylimidazolium chloride ionic liquids. *Green Chem.* **2009**, 11, (4), 492-497.
6. Cornellas, A.; Perez, L.; Comelles, F.; Ribosa, I.; Manresa, A.; Garcia, M. T., Self-aggregation and antimicrobial activity of imidazolium and pyridinium based ionic liquids in aqueous solution. *J. Colloid. Interface Sci.* **2011**, 355, (1), 164-171.
7. Qin, J.; Guo, J.; Xu, Q.; Zheng, Z.; Mao, H.; Yan, F., Synthesis of pyrrolidinium-type poly(ionic liquid) membranes for antibacterial applications. *ACS Appl. Mater. Interfaces* **2017**, 9, (12), 10504-10511.
8. Siopa, F.; Figueiredo, T.; Frade, R. F. M.; Neto, I.; Meirinhos, A.; Reis, C. P.; Sobral, R. G.; Afonso, C. A. M.; Rijo, P., Choline-based ionic liquids: Improvement of antimicrobial activity. *ChemistrySelect* **2016**, 1, (18), 5909-5916.
9. Demberelnyamba, D.; Kim, K.-S.; Choi, S.; Park, S.-Y.; Lee, H.; Kim, C.-J.; Yoo, I.-D., Synthesis and antimicrobial properties of imidazolium and pyrrolidinium salts. *Bioorg. Med. Chem. Lett.* **2004**, 12, (5), 853-857.
10. Bergamo, V. Z.; Donato, R. K.; Dalla Lana, D. F.; Donato, K. J. Z.; Ortega, G. G.; Schrekker, H. S.; Fuentesfria, A. M., Imidazolium salts as antifungal agents: strong antibiofilm activity against multidrug-resistant *Candida tropicalis* isolates. *Lett. Appl. Microbiol.* **2015**, 60, (1), 66-71.
11. Florio, W.; Rizzato, C.; Becherini, S.; Guazzelli, L.; D'Andrea, F.; Lupetti, A., Synergistic activity between colistin and the ionic liquids 1-methyl-3-dodecylimidazolium bromide, 1-dodecyl-1-methylpyrrolidinium bromide, or 1-dodecyl-1-methylpiperidinium bromide against Gram-negative bacteria. *J. Glob. Antimicrob Resist.* **2020**, 21, 99-104.
12. Gundolf, T.; Rauch, B.; Kalb, R.; Rossmannith, P.; Mester, P., Influence of bacterial lipopolysaccharide modifications on the efficacy of antimicrobial ionic liquids. *J. Mol. Liq.* **2018**, 271, 220-227.
13. Cole, M. R.; Li, M.; El-Zahab, B.; Janes, M. E.; Hayes, D.; Warner, I. M., Design, synthesis, and biological evaluation of  $\beta$ -lactam antibiotic-based imidazolium- and pyridinium-type ionic liquids. *Chem. Biol. Drug Des.* **2011**, 78, (1), 33-41.
14. Hough-Troutman, W. L.; Smiglak, M.; Griffin, S.; Matthew Reichert, W.; Mirska, I.; Jodynis-Liebert, J.; Adamska, T.; Nawrot, J.; Stasiewicz, M.; Rogers, R. D.; Pernak, J., Ionic liquids with dual biological function: sweet and anti-microbial, hydrophobic quaternary ammonium-based salts. *New J. Chem.* **2009**, 33, (1), 26-33.
15. Florio, W.; Becherini, S.; D'Andrea, F.; Lupetti, A.; Chiappe, C.; Guazzelli, L., Comparative evaluation of antimicrobial activity of different types of ionic liquids. *Mater. Sci. Eng., C* **2019**, 104, 109907.
16. Gindri, I. M.; Siddiqui, D. A.; Bhardwaj, P.; Rodriguez, L. C.; Palmer, K. L.; Frizzo, C. P.; Martins, M. A. P.; Rodrigues, D. C., Dicationic imidazolium-based ionic liquids: a new strategy for non-toxic and antimicrobial materials. *RSC Adv.* **2014**, 4, (107), 62594-62602.

17. Ganapathi, P.; Ganesan, K., Anti-bacterial, catalytic and docking behaviours of novel di/trimeric imidazolium salts. *J. Mol. Liq.* **2017**, 233, 452-464.
